# Supplementary material
Source: PubMed Central journal article supplement (PMC6286193)
Supplement: NIHMS1510466-supplement-1.pdf [file NIHMS1510466-supplement-1.pdf]

Copyright WILEY-VCH Verlag GmbH & Co. KGaA, 69469 Weinheim, Germany, 2016.

## Supporting Information

### **Desktop-Stereolithography 3D-Printing of a Poly(dimethylsiloxane)-based Material with Sylgard-184 Properties**

*Nirveek Bhattacharjee\*, Cesar Parra-Cabrera, Yong Tae Kim, Alexandra P. Kuo, Albert Folch\**

## Supplementary Figures

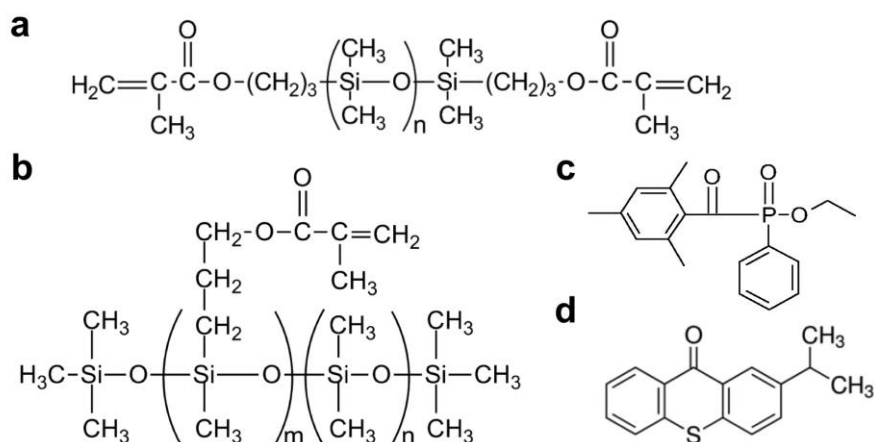

**Figure S1: Resin Components.** Chemical formulae of the resin components – (a) Macromer 1: end-terminated methacryloxypropyl poly(dimethyl siloxane), (b) Macromer 2: copolymer of methacryloxypropyl poly(dimethyl siloxane) and poly(dimethyl siloxane), (c) Photoinitiator: ethyl (2,4,6-trimethylbenzoyl) phenyl phosphinate (TPO-L) and (d) Photosensitizer: isopropyl thioxanthone (ITX).

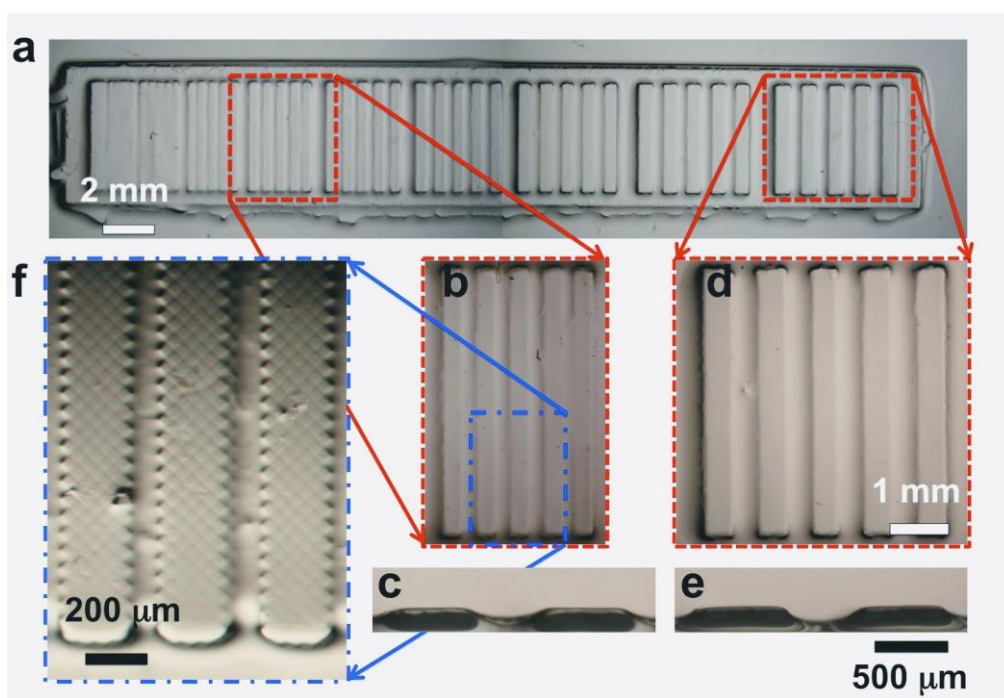

**Figure S2: XY-Resolution Characterization of 3DP-PDMS-S.** Spatial (XY) resolution of SL-printing using 3DP-PDMS-S (with 0.6% TPO-L and 0.3% ITX): (a) Sets of five 200  $\mu\text{m}$  tall lines with the following widths and separations (from left to right) – 50, 100, 150, 200, 250, 300, 350, 400, 450 and 500  $\mu\text{m}$ . Magnified top (b) and cross-sectional (c) views of the 500  $\mu\text{m}$  wide lines separated by 500  $\mu\text{m}$ . Magnified top (d) and cross-sectional (e) views of the 250  $\mu\text{m}$  lines separated by 250  $\mu\text{m}$ . (f) Higher magnification micrographs of the SL-printed 250  $\mu\text{m}$  lines showing imprints of the projected pixel borders of the DLP system.

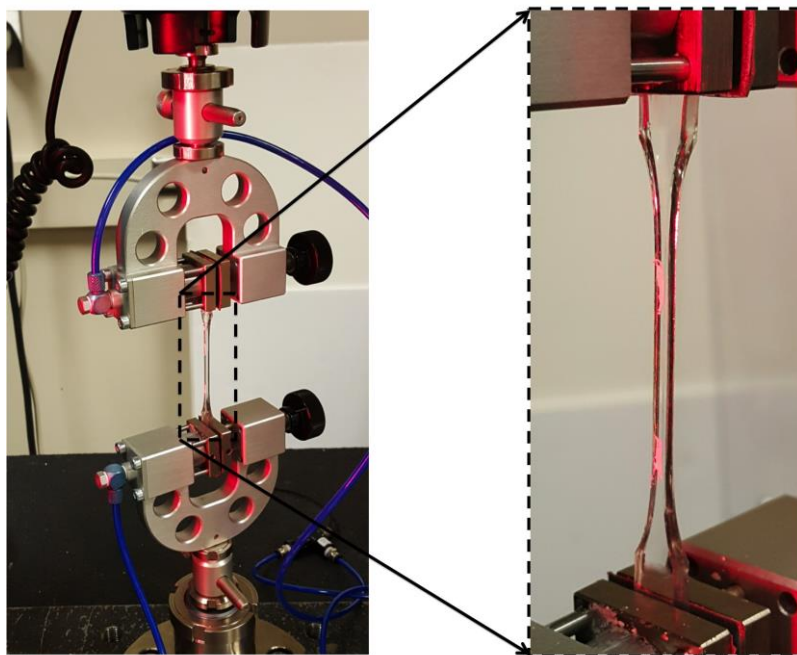

**Figure S3:** Material testing of dog-bone shaped 3DP-PDMS specimens using an Instron 5584H Load Frame equipped with a 50 N load cell to measure the Young's modulus and the elongation-at-break. (Inset) Magnified image of a specimen made of 3DP-PDMS with an E:S = 14 and TPO-L = 0.8% being subjected to tensile stress using the Instron 5584H Load frame.

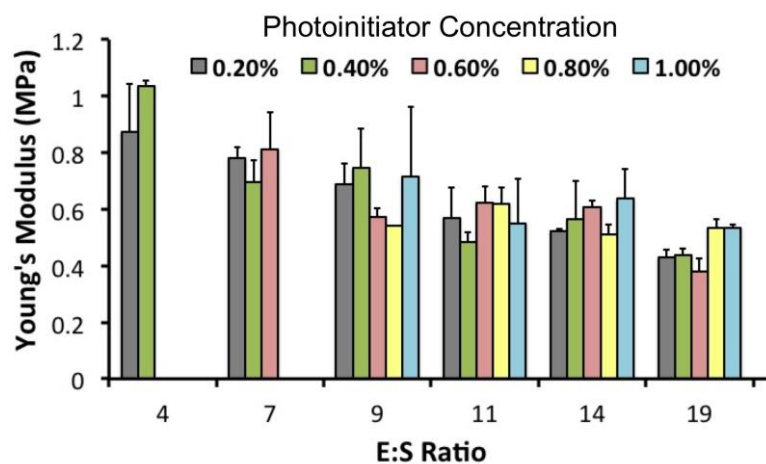

**Figure S4:** Young's modulus of 3DP-PDMS prepared with different ratios of end group and side-chain macromers, and different photo-initiator (TPO-L) concentrations. Error bars are standard deviations.

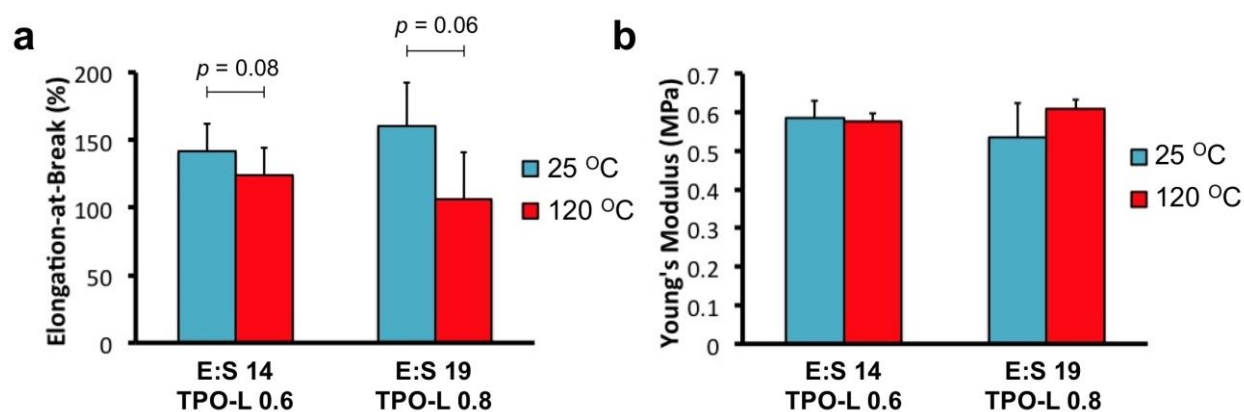

**Figure S5: Thermal Stability of 3DP-PDMS pieces:** (a) Elongation-at-break values and (b) Young's modulus of 3DP-PDMS dog-bone structures prepared with the two optimized Sylgard-184-like E:S blends and heated to 120 °C for 12 hrs. Error bars are SEM (n ≥ 5). Unpaired two-tailed Student's t-test did not show any significant difference between the elongation-at-break and Young's modulus means at 25 °C and 120 °C in either of the two E:S blends tested ( $p > 0.05$ ).

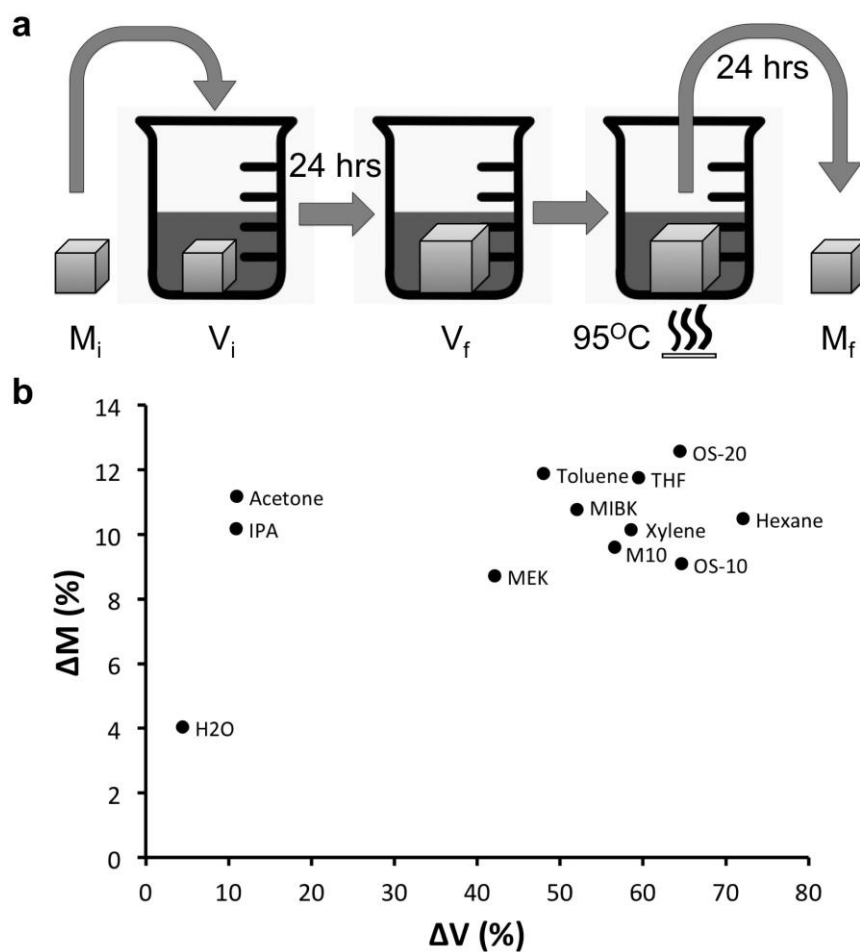

**Figure S6: Solubility of 3DP-PDMS-S in Organic Solvents.** (a) Schematic for measuring the swelling ratio and concomitant mass loss of 5 mm 3DP-PDMS-S cubes in different organic solvents. (b) Scatter plot of the change in mass (due to extraction) and the change in volume (due to swelling) of 5 mm 3DP-PDMS-S cubes in different organic solvents.

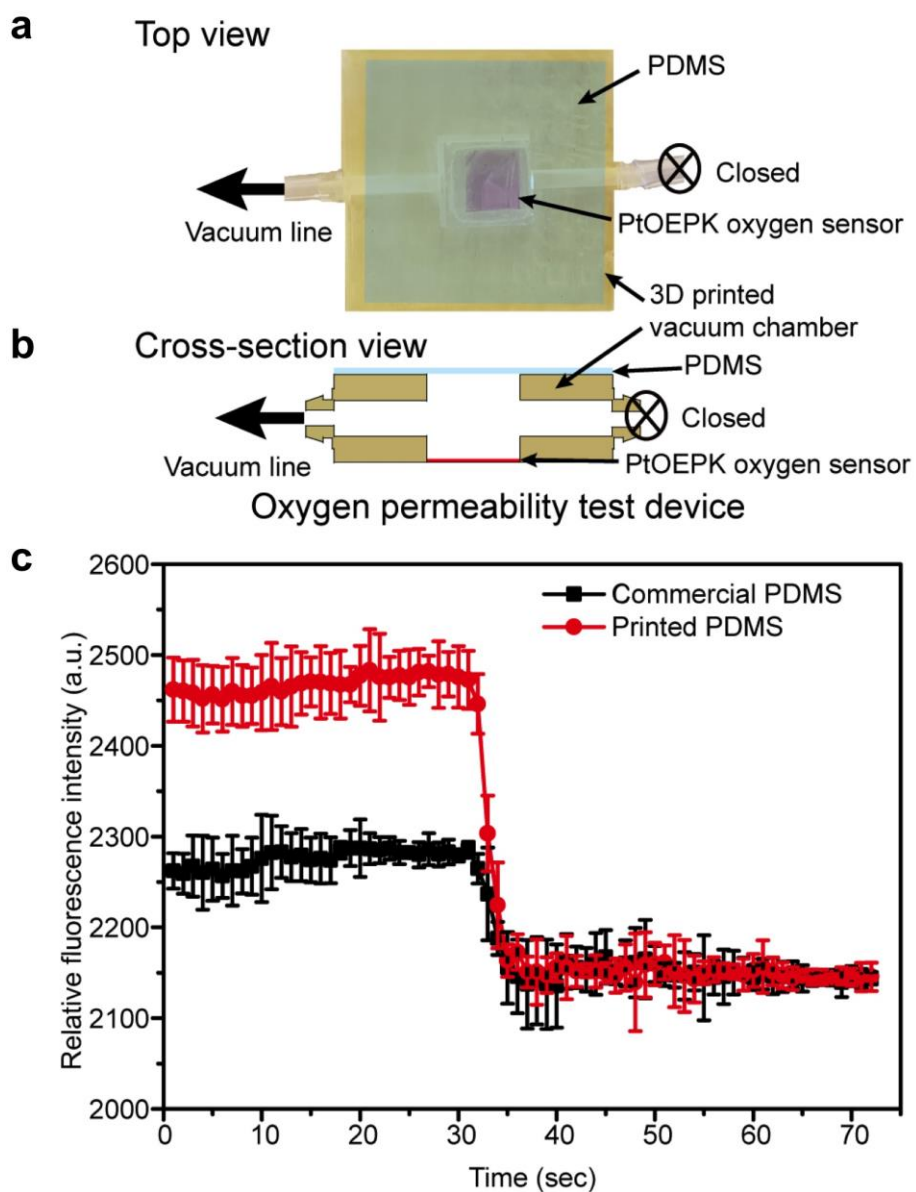

**Figure S7: Gas Permeability Measurements.** (a) Top view of the vacuum chamber device used for measuring the gas permeability of PDMS membranes. (b) Fluorescence intensity values measured every 1 sec as the chamber is allowed to equilibrate to atmosphere after being subjected to vacuum for 30 sec. Measurements were taken at 5 different positions on the sensor. The error bars denote standard deviation.

**Supplementary Movies**

**Movie S1**: Transparent hollow cubes printed with 3DP-PDMS-S (with 0.6% TPO-L) being compressed.

**Movie S2**: Transparent and flexible dog-bone shaped elastomeric specimen SL-printed with 3DP-PDMS (E:S ratio = 14 and TPO-L = 0.8%) being bent and twisted.

## Supplementary Tables

**Table S1: Molecular properties of commercially-available silicone methacrylate macromers**

|            | Gelest<br>Catalog # | Viscosity | MW    | # methacr groups<br>per molecule |
|------------|---------------------|-----------|-------|----------------------------------|
| 3DP-PDMS-S | RMS-033             | 1000-2000 | 31300 | 5                                |
|            | RMS-044             | 7000-9000 | 57500 | 16                               |
|            | RMS-083             | 4000-6000 | 38000 | 16                               |
| 3DP-PDMS-E | DMS-R31             | 900-1000  | 25000 | 2                                |
|            | DMS-R22             | 125-250   | 10000 | 2                                |

**Table S2: Penetration depths of different 3DP-PDMS-S resins with different concentrations of TPO-L and ITX**

| TPO-L (%) | ITX (%) | $h_p$ ( $\mu\text{m}$ ) |                                  |
|-----------|---------|-------------------------|----------------------------------|
| 0.6       | 0       | 331.9                   |                                  |
| 0.6       | 0.1     | 281.1                   |                                  |
| 0.6       | 0.2     | 253.2                   |                                  |
| 0.6       | 0.3     | 212.5                   | → Most transparent resin mixture |
| 0.8       | 0.4     | 207.4                   |                                  |
| 1.0       | 0.5     | 178.0                   |                                  |

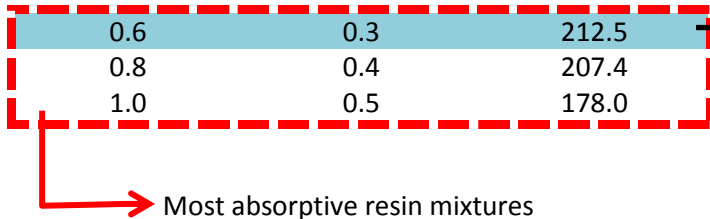
 Most absorptive resin mixtures

**Table S3: Comparison of properties of different commercial and published elastomeric SL-resins**

| Elastomeric SL-Resins |                        | Young's Modulus (or UTS *) (MPa) | Elongation at Break (%) | Transparency                               | Resolution of unsupported structures | Biocompatibility            |
|-----------------------|------------------------|----------------------------------|-------------------------|--------------------------------------------|--------------------------------------|-----------------------------|
| Company or Lab        | Resin Name             |                                  |                         |                                            |                                      |                             |
| Formlabs              | Flexible <sup>1</sup>  | 3.3 – 3.4 (UTS)                  | 75 - 85                 | Translucent Gray, Opaque Black             | not shown                            | unknown                     |
| Stratasys             | TangoPlus <sup>2</sup> | 0.1 – 0.3                        | 218                     | Translucent White                          | not shown                            | unknown                     |
| Spot-A                | Elastic <sup>3</sup>   | 12                               | 65                      | Opaque Red                                 | not shown                            | unknown                     |
| Carbon                | EPU40 <sup>4</sup>     | 10.2 (UTS)                       | 310                     | Opaque Black                               | not shown                            | cytocompatible <sup>a</sup> |
| Carbon                | SIL30 <sup>5</sup>     | 3.4 (UTS)                        | 330                     | Translucent White                          | not shown                            | cytocompatible <sup>a</sup> |
| Boydston              | SilOHFlex <sup>6</sup> | 1.02 (UTS)                       | 338                     | Translucent, Colored (prints) <sup>b</sup> | ~ 1 cm                               | unknown                     |
| Magdassi              | SUV <sup>7</sup>       | 0.58 - 4.21                      | 220 – 1100              | Transparent to Translucent <sup>c</sup>    | ~ 1 cm                               | unknown                     |
| Folch                 | 3DP-PDMS               | 0.52 – 0.94                      | 140 - 160               | Transparent                                | ~500 µm                              | cytocompatible              |
| Dow                   | Sylgard-184            | 1.3 (10:1)                       | 140                     | Transparent                                | ~1 µm                                | cytocompatible              |

\* UTS = Ultimate Tensile Strength

<sup>1</sup> <https://formlabs.com/media/upload/XL-DataSheet.pdf> (accessed: February 2017)

<sup>2</sup> [http://usglobalimages.stratasys.com/Main/Files/Material\\_Spec\\_Sheets/MSS\\_PJ\\_PJMaterialsDataSheet.pdf](http://usglobalimages.stratasys.com/Main/Files/Material_Spec_Sheets/MSS_PJ_PJMaterialsDataSheet.pdf) (accessed: February 2017)

<sup>3</sup> [http://spotamaterials.com/wp/wp-content/uploads/2017/06/Spot\\_E\\_TDS\\_1115\\_0517.pdf](http://spotamaterials.com/wp/wp-content/uploads/2017/06/Spot_E_TDS_1115_0517.pdf) (accessed: February 2017)

<sup>4</sup> <https://www.carbon3d.com/materials/epu-elastomeric-polyurethane/> (accessed: February 2017)

<sup>5</sup> <https://www.carbon3d.com/materials/silicone/> (accessed: February 2017)

<sup>6</sup> PDMS dimethacrylamide (9%), butyl acrylate (27%), hydroxyethyl acrylate (56%) – note that the other elastomeric resins reported in the paper are hydrogels

<sup>7</sup> Blend of epoxy aliphatic acrylate and aliphatic urethane acrylate with 33% isobornyl acrylate

<sup>a</sup> Evaluated in accordance with ISO-10993-5 (cytotoxicity) and ISO-10993-10 (irritation)

<sup>b</sup> Thin SilOHFlex pieces appear translucent, but the printed parts shown in the paper are pigmented (possibly for increasing resolution and ensuring printability)

<sup>c</sup> The more stretchable polymers are translucent (30-50% transmittance at 550 nm), whereas the less stretchable polymers are more transparent (80-90% transmittance at 550 nm)
